# Supplementary material for: Hyperspectral dark field optical microscopy for orientational imaging of a single plasmonic nanocube using a physics-based learning method
Source: Royal Society of Chemistry journal article supplement (doi:10.1039/d2na00469k), 2022-01-01
Supplement: d2na00469k1.pdf [file d2na00469k1.pdf]

## Supplementary Information

### **Hyperspectral Dark Field Optical Microscopy for Orientational Imaging of a Single Plasmonic Nanocube using Physics-based Learning Method**

Nishir Mehta<sup>1</sup>, Amirreza Mahigir<sup>2,3</sup>, Georgios Veronis<sup>2,3</sup>, Manas Ranjan Gartia<sup>1,\*</sup>

*<sup>1</sup>Department of Mechanical and Industrial Engineering, <sup>2</sup>School of Electrical Engineering and Computer Science, Louisiana State University, Baton Rouge, Louisiana 70803, USA*

*<sup>3</sup>Center for Computation and Technology, Louisiana State University, Baton Rouge, Louisiana 70803, USA*

*\*E-mail: [mgartia@lsu.edu](mailto:mgartia@lsu.edu)*

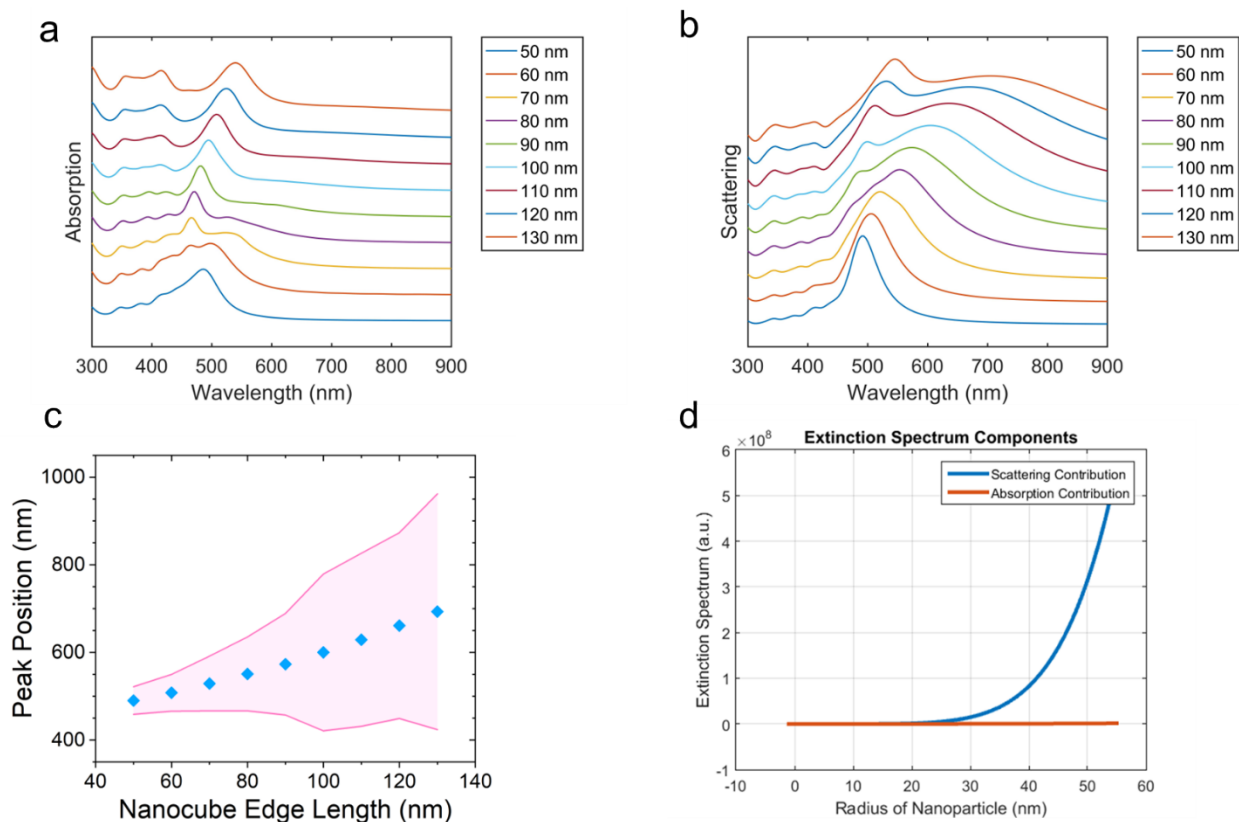

**Figure S1.** Calculated (a) absorption, and (b) scattering spectra of a single nanocube in water as a function of the nanocube size. (c) Variation of scattering peak positions as a function of nanocube edge length. The corresponding full-width half-maximum (FWHM) is shown as shaded area. (d) Contribution of scattering and absorption to the extinction spectra as a function of nanocube size.

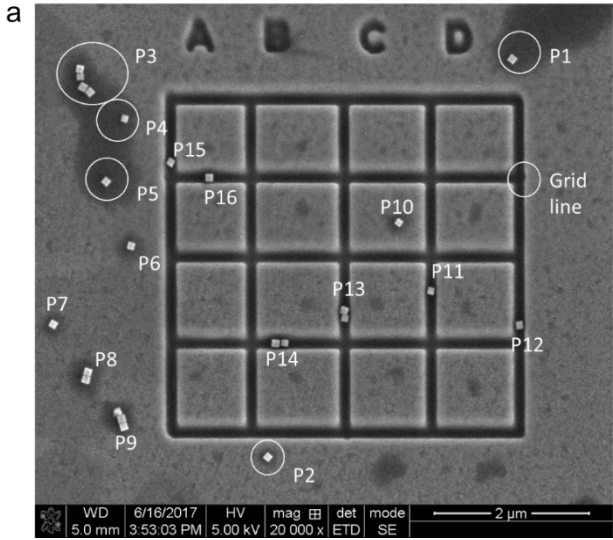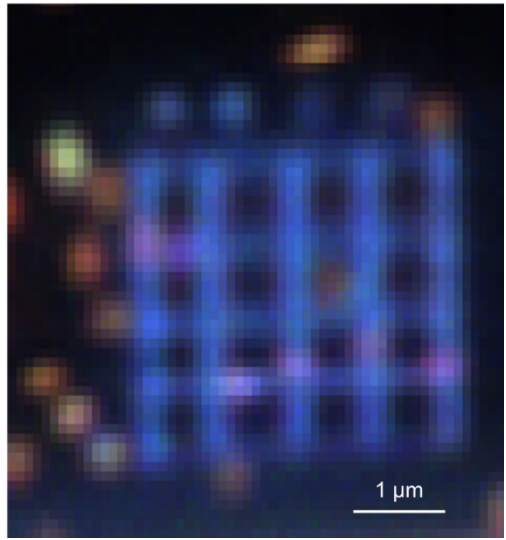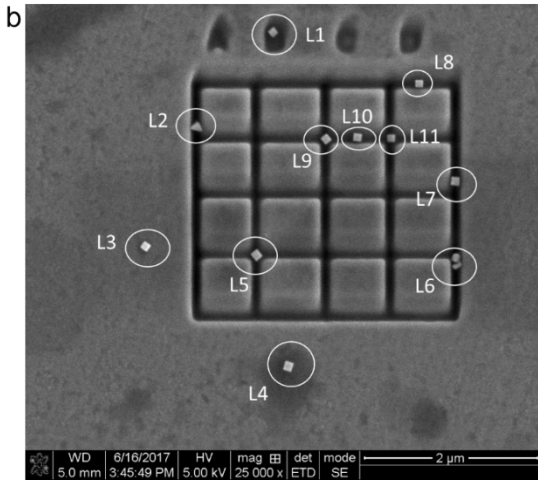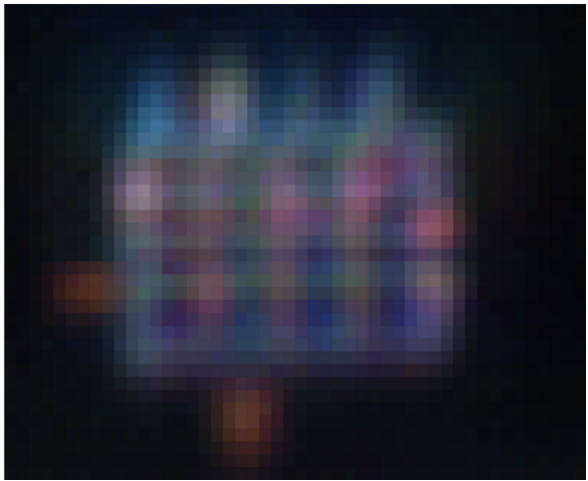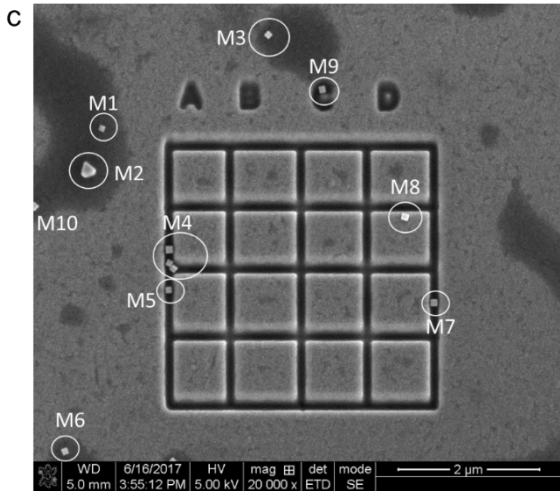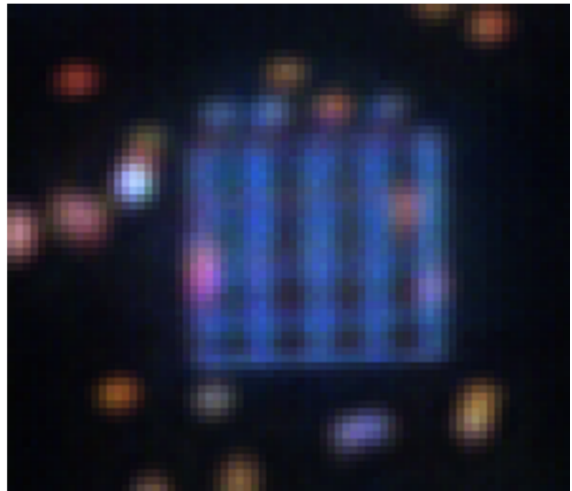

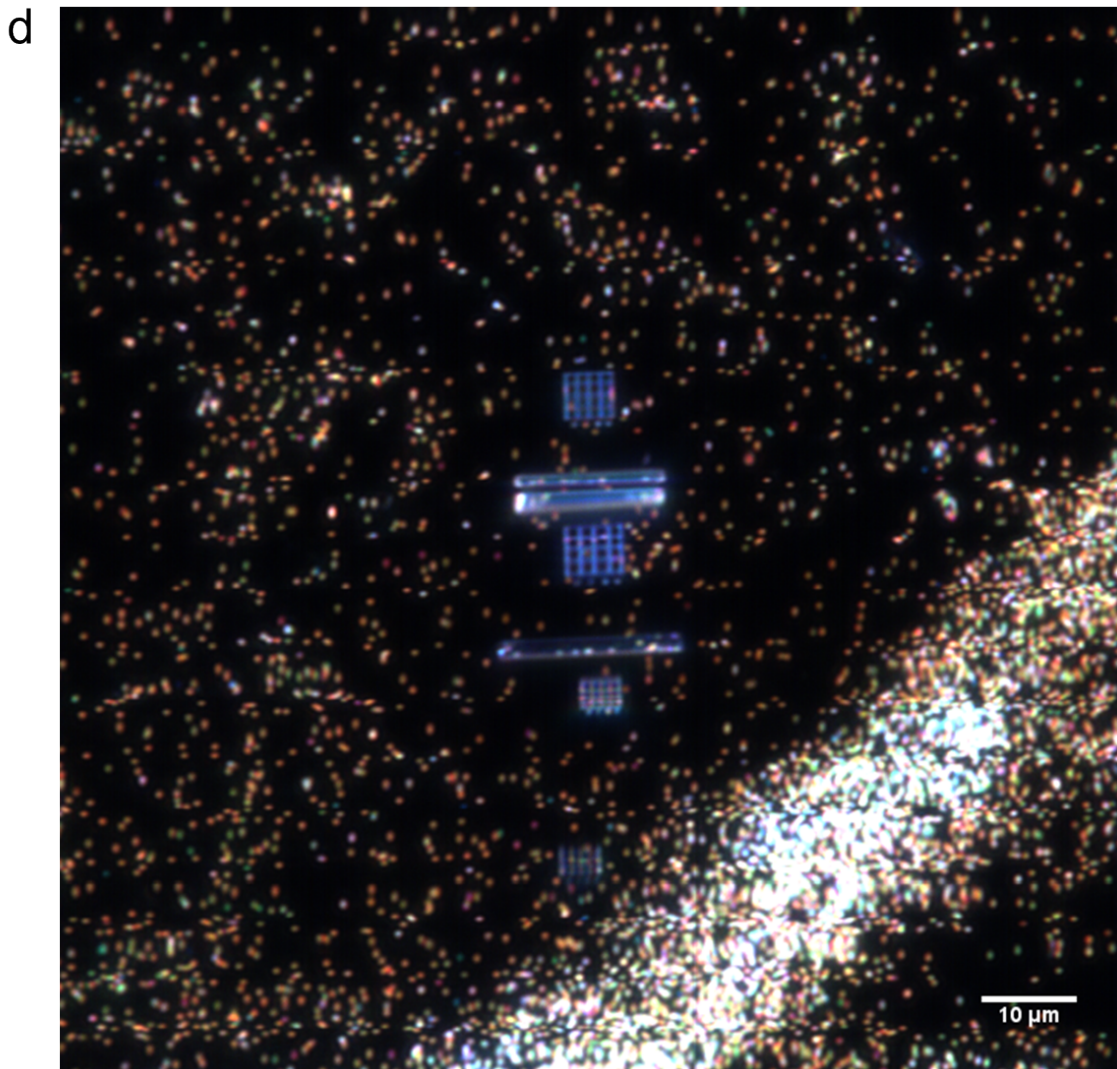

**Figure S2. (a-c)** Representative SEM images and their corresponding hyperspectral images used for correlative microscopy analysis. **(d)** Representative image of a hyperspectral image from a wide field of view showing many nanocubes.
